# Supplementary material
Source: PubMed Central journal article supplement (PMC7332400)
Supplement: NIHMS1594903-supplement-1.pdf [file NIHMS1594903-supplement-1.pdf]

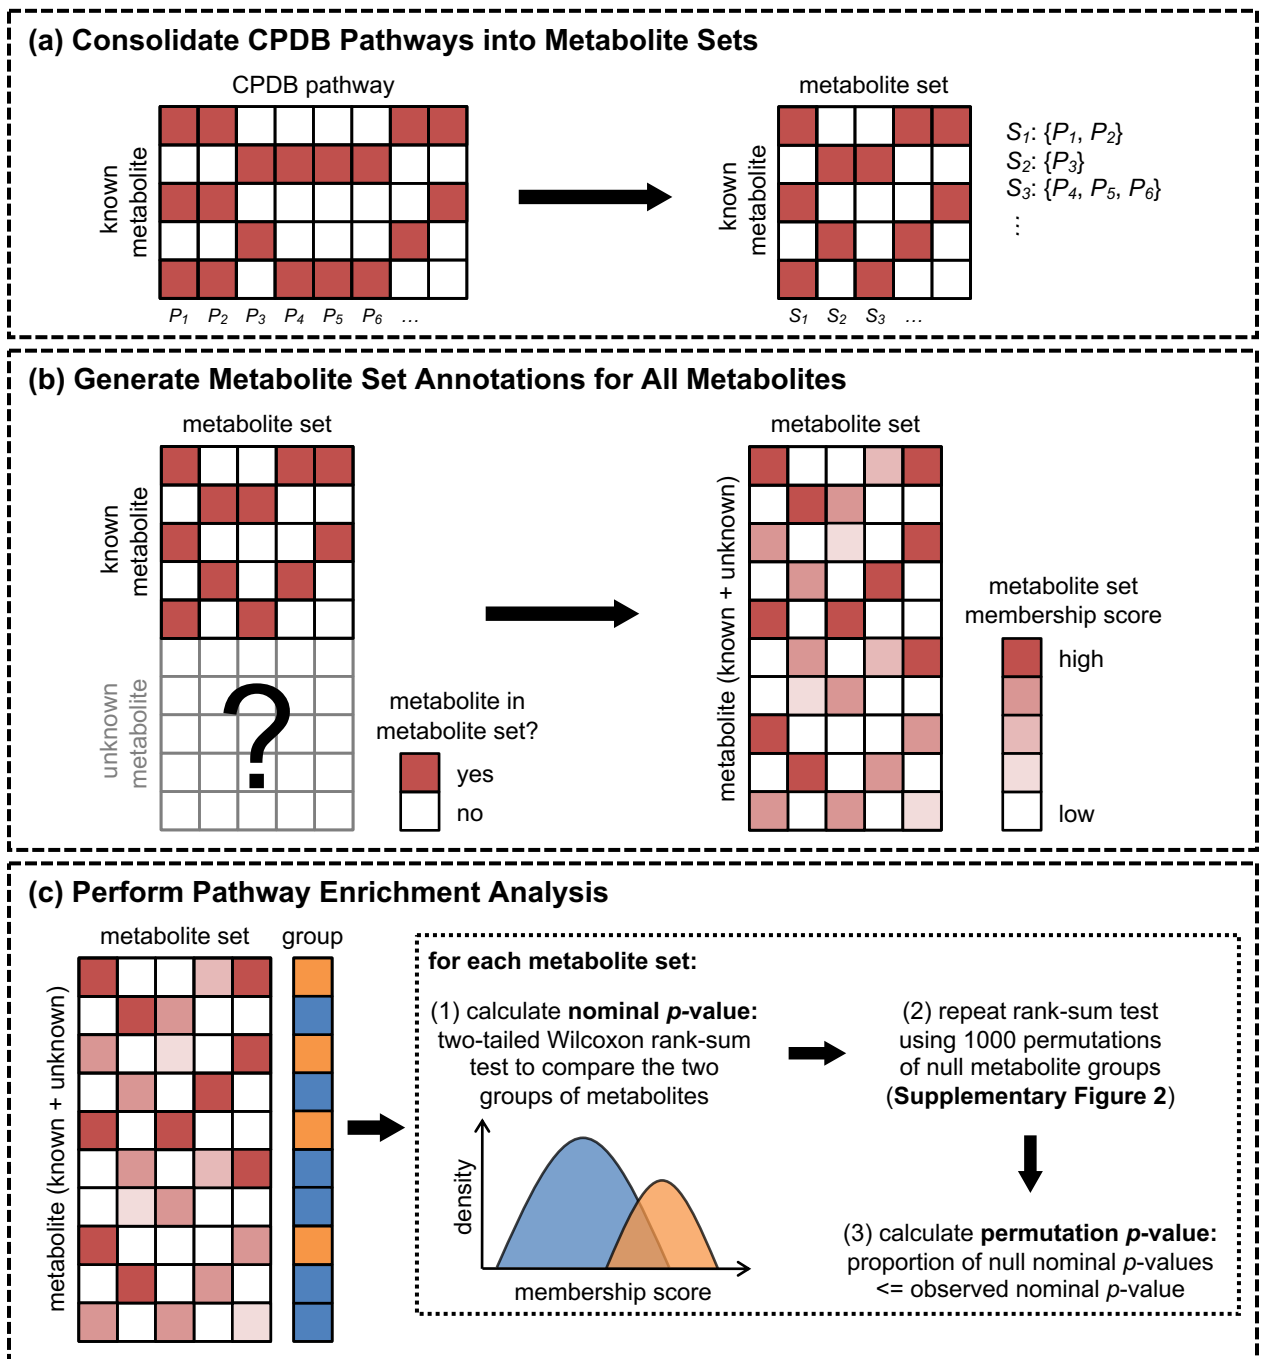

**Supplementary Figure 1. PAIRUP-MS pathway annotation and analysis framework.** (a) ConsensusPathDB (CPDB) pathways containing at least two known metabolites measured in BioAge data were consolidated into metabolite sets with unique metabolite combinations (e.g. pathways  $P_1$  and  $P_2$  were consolidated into metabolite set  $S_1$ ). (b) Metabolite correlation structure in BioAge data were used to extend (reconstitute) the metabolite sets to include both known and unknown metabolites, calculating a numeric membership score for each metabolite in each metabolite set. (c) To identify enriched metabolite sets differing between two groups of metabolites, for each metabolite set: (1) two-tailed Wilcoxon rank-sum test was performed to calculate a nominal  $p$ -value, (2) the rank-sum test was repeated 1000 times using null metabolite groups (see **Supplementary Figure 2**), and (3) a permutation-based enrichment  $p$ -value was calculated as the proportion of null nominal  $p$ -values  $\leq$  observed nominal  $p$ -value.

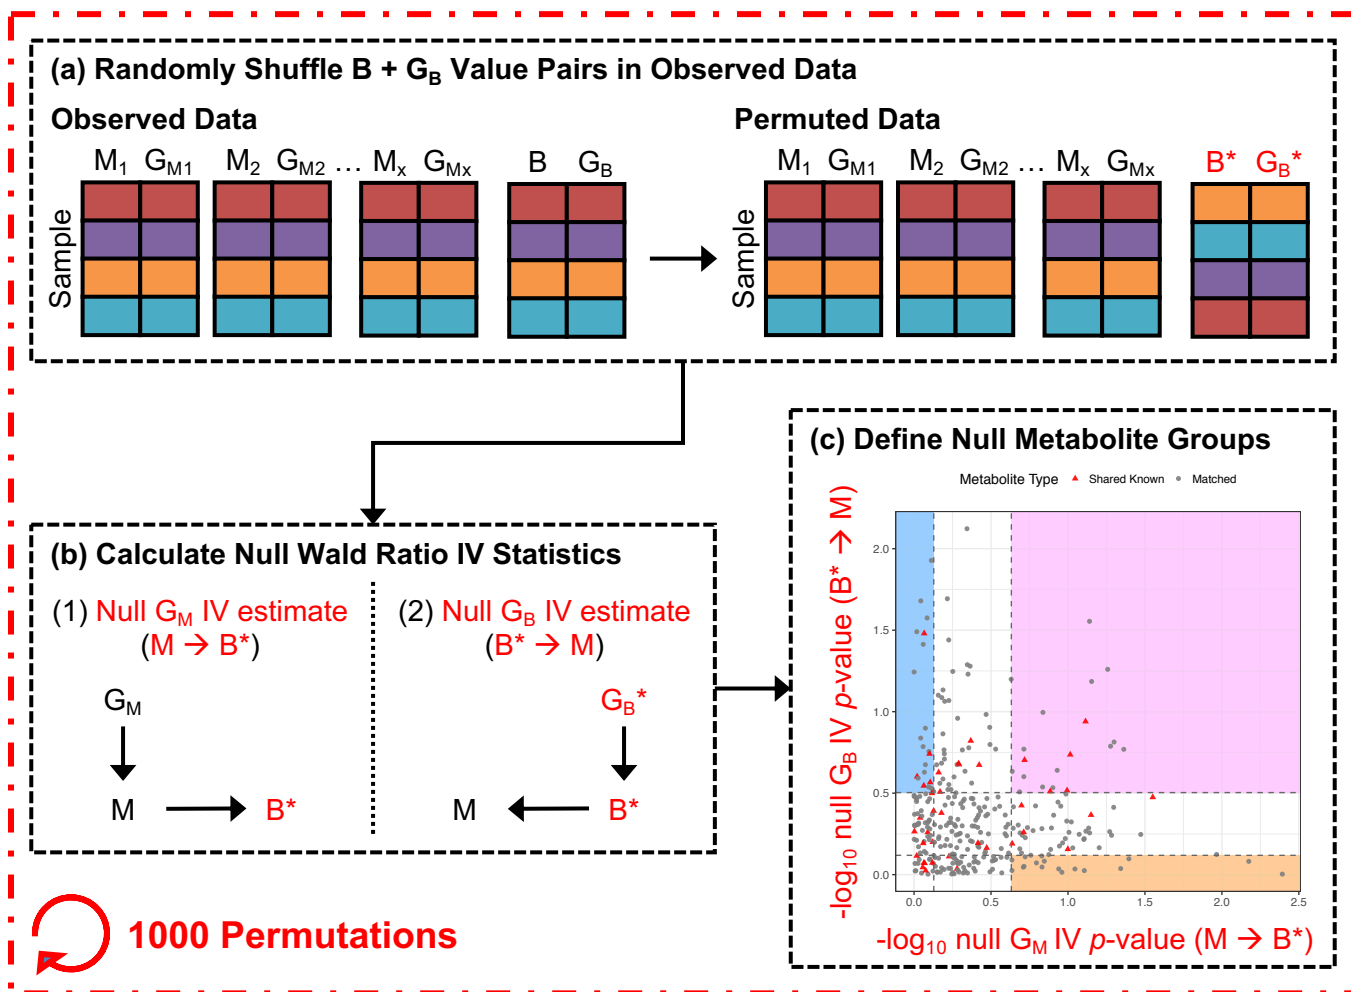

**Supplementary Figure 2. Scheme for generating null metabolite groups used in pathway analyses.** (a) For each permutation, we randomly shuffled the BMI (B) and  $G_B$  value pairs in OE and MCDS data, while leaving the metabolites (M) and  $G_M$  data unchanged. Same color shading in the cartoon matrices indicates data that originated from the same sample in observed data.  $B^*$  and  $G_{B^*}$ , permuted BMI and  $G_B$  data, respectively. (b) We used the permuted data to calculate null Wald ratio IV statistics for both  $G_M$  (metabolite-to-BMI direction,  $M \rightarrow B^*$ ) and  $G_B$  (BMI-to-metabolite direction,  $B^* \rightarrow M$ ). (c) We used the top and bottom quartile cutoffs of the null IV  $p$ -values to define null cause, effect, and bidirectional metabolite groups (mirroring how we defined the observed metabolite groups). The entire permutation procedure (steps (a) – (c)) was repeated 1000 times to generate 1000 sets of null metabolite groups, which were used to calculate the permutation-based pathway enrichment  $p$ -values in PAIRUP-MS pathway analyses (see **Supplementary Figure 1c**).

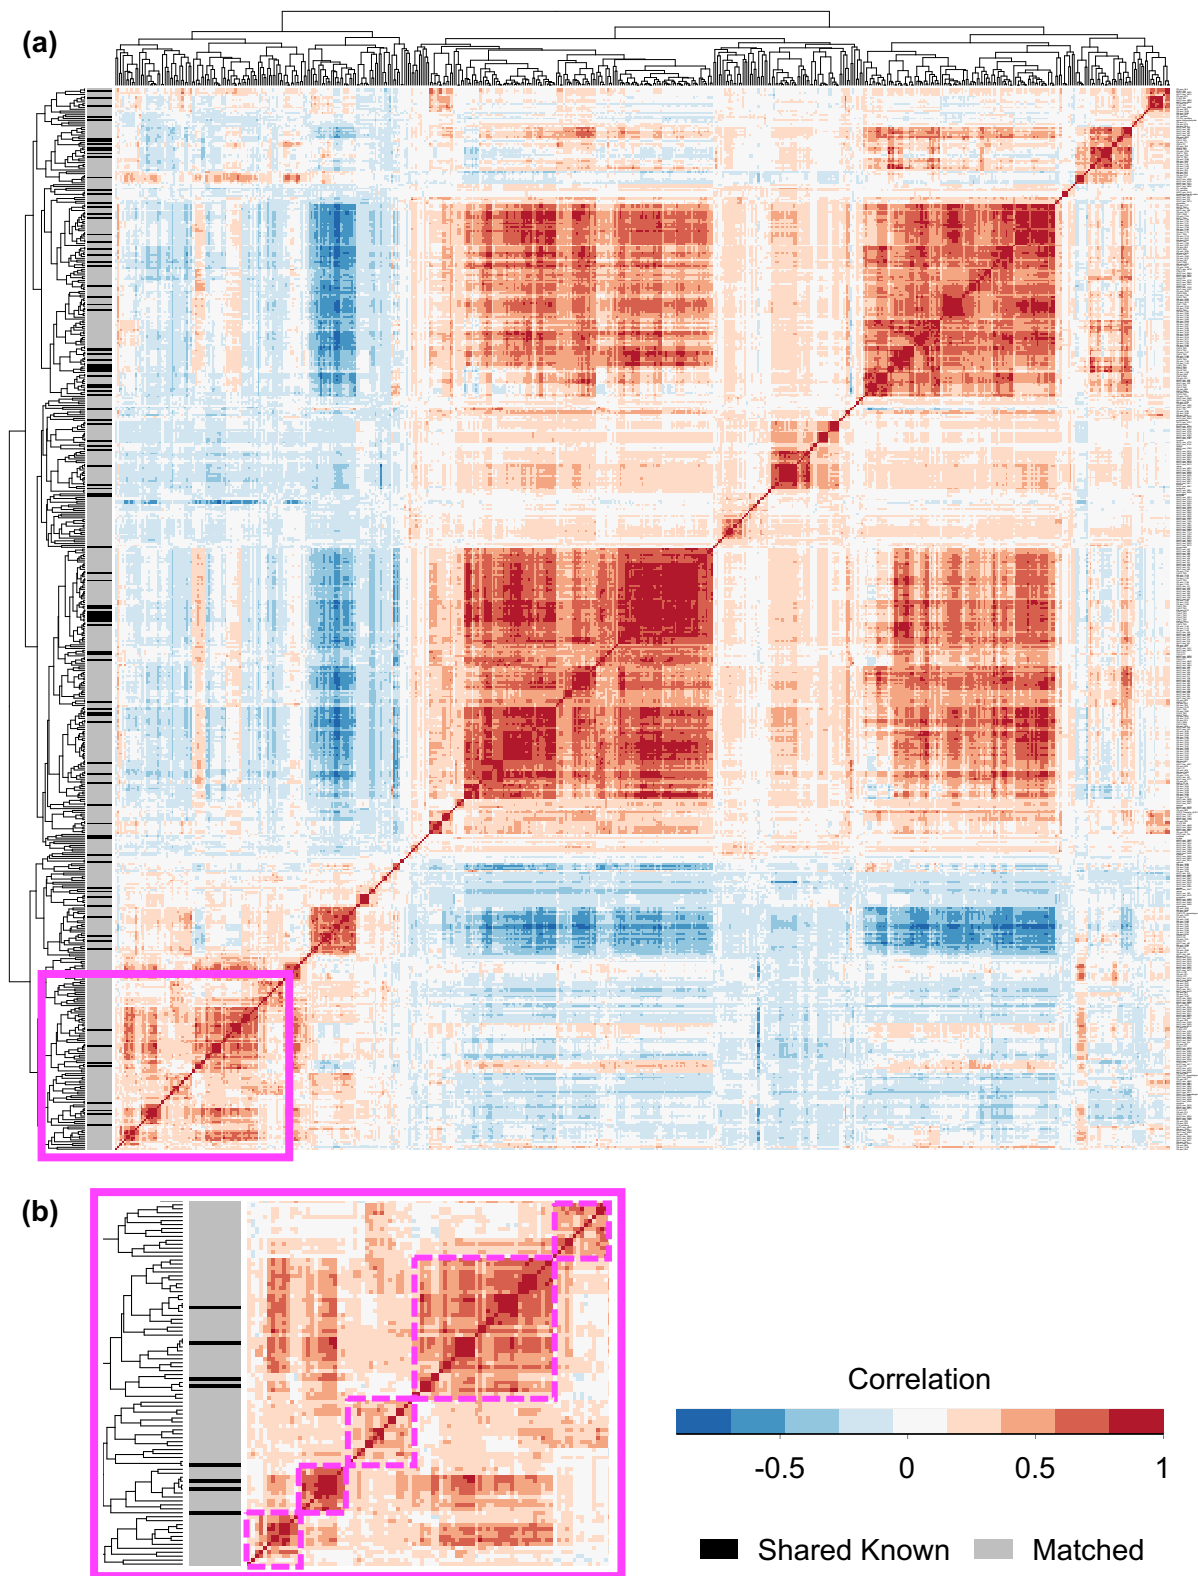

**Supplementary Figure 3. Clustered correlation heat map of 577 BMI-associated metabolites in OE and MCDS.** (a) Heat map of all BMI-associated metabolites. Euclidean distance-based hierarchical clustering was performed on pairwise correlations of the metabolites in OE+MCDS samples. Shared known (black) and matched (grey) metabolites are annotated by side bar on the left. (b) Zoomed-in view of a portion of the heat map (solid pink box in (a)), with distinct clusters (as defined by the clustering dendrogram) highlighted by pink dashed boxes.

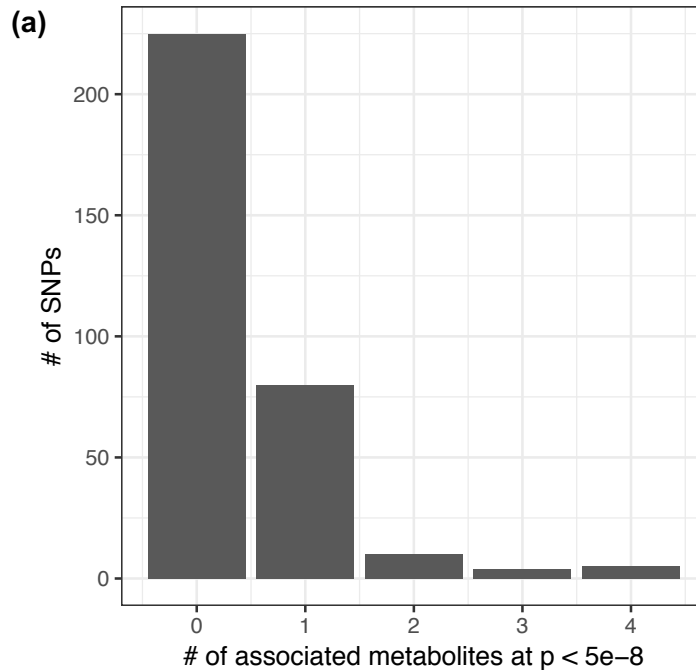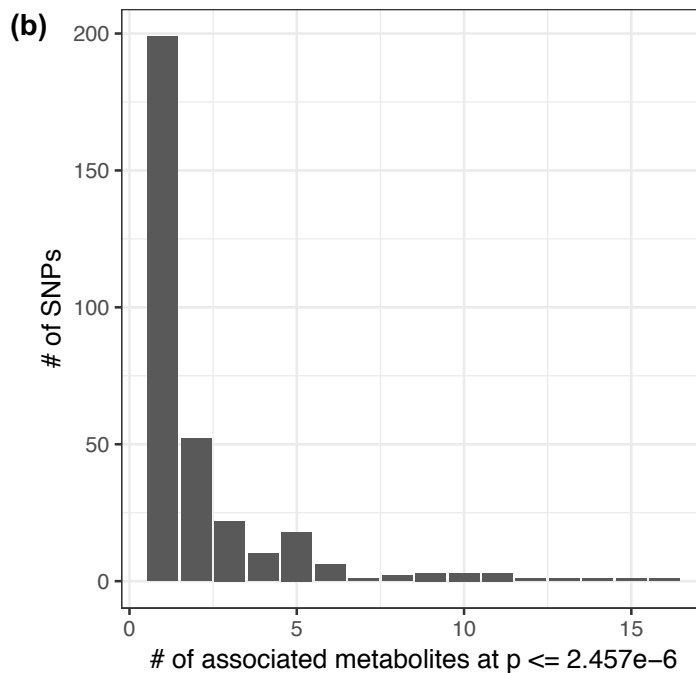

**Supplementary Figure 4. Level of association between the 324  $G_M$  SNPs and the 324 BMI-associated metabolites in OE and MCDS. (a) Histogram showing number of metabolites associated with each SNP at genome-wide significance ( $p < 5 \times 10^{-8}$ ); 19 out of 324 (5.86%) SNPs are associated with  $> 1$  metabolite. (b) Histogram showing number of metabolites associated with each SNP at  $p \leq 2.457 \times 10^{-6}$  (maximum  $p$ -value for the selected metabolite- $G_M$  pairs); 125 out of 324 (38.6%) SNPs are associated with  $> 1$  metabolite.**
